# Supplementary material for: Directed assembly of optoelectronically active alkyl–π-conjugated molecules by adding n-alkanes or π-conjugated species
Source: Springer Nature journal article supplement (doi:10.1038/nchem.1977), 2014-06-20
Supplement: 41557_2014_BFnchem1977_MOESM1_ESM.mol [file 41557_2014_BFnchem1977_MOESM1_ESM.mol]

  ChemDraw06031408202D

120152  0  0  0  0  0  0  0  0999 V2000
   -6.0938   -0.5518    0.0000 C   0  0  0  0  0  0  0  0  0  0  0  0
   -6.0938   -1.3768    0.0000 C   0  0  0  0  0  0  0  0  0  0  0  0
   -5.3091   -1.6318    0.0000 C   0  0  0  0  0  0  0  0  0  0  0  0
   -4.8242   -0.9643    0.0000 C   0  0  0  0  0  0  0  0  0  0  0  0
   -5.3091   -0.2969    0.0000 C   0  0  0  0  0  0  0  0  0  0  0  0
   -4.0037   -0.8781    0.0000 C   0  0  0  0  0  0  0  0  0  0  0  0
   -3.6682   -0.1244    0.0000 C   0  0  0  0  0  0  0  0  0  0  0  0
   -4.1531    0.5430    0.0000 C   0  0  0  0  0  0  0  0  0  0  0  0
   -4.9736    0.4568    0.0000 C   0  0  0  0  0  0  0  0  0  0  0  0
   -5.7507    1.0621    0.0000 C   0  0  0  0  0  0  0  0  0  0  0  0
   -6.5353    0.8072    0.0000 C   0  0  0  0  0  0  0  0  0  0  0  0
   -6.7069    0.0002    0.0000 C   0  0  0  0  0  0  0  0  0  0  0  0
   -7.5227   -0.5518    0.0000 C   0  0  0  0  0  0  0  0  0  0  0  0
   -7.5227   -1.3768    0.0000 C   0  0  0  0  0  0  0  0  0  0  0  0
   -6.8082   -1.7893    0.0000 C   0  0  0  0  0  0  0  0  0  0  0  0
   -4.9736   -2.3855    0.0000 C   0  0  0  0  0  0  0  0  0  0  0  0
   -4.1531   -2.4717    0.0000 C   0  0  0  0  0  0  0  0  0  0  0  0
   -3.6682   -1.8043    0.0000 C   0  0  0  0  0  0  0  0  0  0  0  0
   -6.7293   -2.5973    0.0000 C   0  0  0  0  0  0  0  0  0  0  0  0
   -5.6979   -2.9411    0.0000 C   0  0  0  0  0  0  0  0  0  0  0  0
   -4.1531   -3.2967    0.0000 C   0  0  0  0  0  0  0  0  0  0  0  0
   -2.8713   -1.5907    0.0000 C   0  0  0  0  0  0  0  0  0  0  0  0
   -2.8713   -2.4157    0.0000 C   0  0  0  0  0  0  0  0  0  0  0  0
   -3.3562   -3.0832    0.0000 C   0  0  0  0  0  0  0  0  0  0  0  0
   -2.8432   -0.1244    0.0000 C   0  0  0  0  0  0  0  0  0  0  0  0
   -2.8432    0.7006    0.0000 C   0  0  0  0  0  0  0  0  0  0  0  0
   -4.1531    1.3680    0.0000 C   0  0  0  0  0  0  0  0  0  0  0  0
   -3.3562    1.1545    0.0000 C   0  0  0  0  0  0  0  0  0  0  0  0
   -5.3382    1.7766    0.0000 C   0  0  0  0  0  0  0  0  0  0  0  0
   -7.3322    1.0207    0.0000 C   0  0  0  0  0  0  0  0  0  0  0  0
   -6.9197    1.7352    0.0000 C   0  0  0  0  0  0  0  0  0  0  0  0
   -6.1351    1.9901    0.0000 C   0  0  0  0  0  0  0  0  0  0  0  0
   -7.9352    0.1626    0.0000 C   0  0  0  0  0  0  0  0  0  0  0  0
   -8.5186   -0.4207    0.0000 C   0  0  0  0  0  0  0  0  0  0  0  0
   -7.9352   -2.0913    0.0000 C   0  0  0  0  0  0  0  0  0  0  0  0
   -8.5186   -1.5080    0.0000 C   0  0  0  0  0  0  0  0  0  0  0  0
   -7.4437   -3.0098    0.0000 C   0  0  0  0  0  0  0  0  0  0  0  0
   -5.2854   -3.6556    0.0000 C   0  0  0  0  0  0  0  0  0  0  0  0
   -7.0301   -3.5857    0.0000 C   0  0  0  0  0  0  0  0  0  0  0  0
   -6.1706   -3.8865    0.0000 C   0  0  0  0  0  0  0  0  0  0  0  0
   -7.7445   -3.9982    0.0000 C   0  0  0  0  0  0  0  0  0  0  0  0
   -5.9571   -4.6834    0.0000 C   0  0  0  0  0  0  0  0  0  0  0  0
   -6.9012   -4.6601    0.0000 C   0  0  0  0  0  0  0  0  0  0  0  0
   -3.3562   -3.9082    0.0000 C   0  0  0  0  0  0  0  0  0  0  0  0
   -2.0744   -2.2022    0.0000 C   0  0  0  0  0  0  0  0  0  0  0  0
   -2.3889   -3.3279    0.0000 C   0  0  0  0  0  0  0  0  0  0  0  0
   -2.0182    0.7006    0.0000 C   0  0  0  0  0  0  0  0  0  0  0  0
   -3.1427    1.9514    0.0000 C   0  0  0  0  0  0  0  0  0  0  0  0
   -2.1741    1.5711    0.0000 C   0  0  0  0  0  0  0  0  0  0  0  0
   -5.9216    2.7870    0.0000 C   0  0  0  0  0  0  0  0  0  0  0  0
   -7.6342    2.1477    0.0000 C   0  0  0  0  0  0  0  0  0  0  0  0
   -7.0508    2.7310    0.0000 C   0  0  0  0  0  0  0  0  0  0  0  0
   -9.2330   -0.0082    0.0000 C   0  0  0  0  0  0  0  0  0  0  0  0
   -9.1019   -2.0913    0.0000 C   0  0  0  0  0  0  0  0  0  0  0  0
   -9.6085   -1.0933    0.0000 C   0  0  0  0  0  0  0  0  0  0  0  0
   -7.1793   -5.4338    0.0000 C   0  0  0  0  0  0  0  0  0  0  0  0
   -1.7351   -3.8264    0.0000 C   0  0  0  0  0  0  0  0  0  0  0  0
   -1.5383    2.0925    0.0000 C   0  0  0  0  0  0  0  0  0  0  0  0
   -7.3842    3.4826    0.0000 C   0  0  0  0  0  0  0  0  0  0  0  0
  -10.4288   -1.1494    0.0000 C   0  0  0  0  0  0  0  0  0  0  0  0
   -1.2689    2.9844    0.0000 C   0  0  0  0  0  0  0  0  0  0  0  0
   -1.9544    3.4752    0.0000 N   0  0  0  0  0  0  0  0  0  0  0  0
   -0.4917    3.2523    0.0000 C   0  0  0  0  0  0  0  0  0  0  0  0
   -2.6184    2.9547    0.0000 C   0  0  0  0  0  0  0  0  0  0  0  0
   -1.9544    4.2973    0.0000 C   0  0  0  0  0  0  0  0  0  0  0  0
    0.1423    2.6846    0.0000 C   0  0  0  0  0  0  0  0  0  0  0  0
   -0.3418    4.0924    0.0000 C   0  0  0  0  0  0  0  0  0  0  0  0
    0.9262    2.9569    0.0000 C   0  0  0  0  0  0  0  0  0  0  0  0
    0.4421    4.3647    0.0000 C   0  0  0  0  0  0  0  0  0  0  0  0
    1.5516    2.4232    0.0000 O   0  0  0  0  0  0  0  0  0  0  0  0
    1.0761    3.7970    0.0000 C   0  0  0  0  0  0  0  0  0  0  0  0
    0.6038    5.1708    0.0000 O   0  0  0  0  0  0  0  0  0  0  0  0
    2.3265    2.6979    0.0000 C   0  0  0  0  0  0  0  0  0  0  0  0
    1.3827    5.4338    0.0000 C   0  0  0  0  0  0  0  0  0  0  0  0
    2.9518    2.1642    0.0000 C   0  0  0  0  0  0  0  0  0  0  0  0
    1.9999    4.8907    0.0000 C   0  0  0  0  0  0  0  0  0  0  0  0
    2.8023    1.3558    0.0000 C   0  0  0  0  0  0  0  0  0  0  0  0
    3.7267    2.4389    0.0000 C   0  0  0  0  0  0  0  0  0  0  0  0
    1.8382    4.0847    0.0000 C   0  0  0  0  0  0  0  0  0  0  0  0
    2.7789    5.1537    0.0000 C   0  0  0  0  0  0  0  0  0  0  0  0
    3.4276    0.8221    0.0000 C   0  0  0  0  0  0  0  0  0  0  0  0
    4.3520    1.9052    0.0000 C   0  0  0  0  0  0  0  0  0  0  0  0
    2.4555    3.5416    0.0000 C   0  0  0  0  0  0  0  0  0  0  0  0
    3.3961    4.6107    0.0000 C   0  0  0  0  0  0  0  0  0  0  0  0
    4.2025    1.0968    0.0000 C   0  0  0  0  0  0  0  0  0  0  0  0
    5.1269    2.1800    0.0000 C   0  0  0  0  0  0  0  0  0  0  0  0
    3.2344    3.8046    0.0000 C   0  0  0  0  0  0  0  0  0  0  0  0
    4.1750    4.8737    0.0000 C   0  0  0  0  0  0  0  0  0  0  0  0
    4.8279    0.5631    0.0000 C   0  0  0  0  0  0  0  0  0  0  0  0
    5.7523    1.6462    0.0000 C   0  0  0  0  0  0  0  0  0  0  0  0
    3.8516    3.2615    0.0000 C   0  0  0  0  0  0  0  0  0  0  0  0
    4.7923    4.3306    0.0000 C   0  0  0  0  0  0  0  0  0  0  0  0
    5.6027    0.8378    0.0000 C   0  0  0  0  0  0  0  0  0  0  0  0
    6.5272    1.9210    0.0000 C   0  0  0  0  0  0  0  0  0  0  0  0
    4.6306    3.5245    0.0000 C   0  0  0  0  0  0  0  0  0  0  0  0
    5.5712    4.5936    0.0000 C   0  0  0  0  0  0  0  0  0  0  0  0
    6.2281    0.3041    0.0000 C   0  0  0  0  0  0  0  0  0  0  0  0
    7.1525    1.3873    0.0000 C   0  0  0  0  0  0  0  0  0  0  0  0
    5.2478    2.9815    0.0000 C   0  0  0  0  0  0  0  0  0  0  0  0
    6.1884    4.0505    0.0000 C   0  0  0  0  0  0  0  0  0  0  0  0
    7.0030    0.5788    0.0000 C   0  0  0  0  0  0  0  0  0  0  0  0
    7.9274    1.6620    0.0000 C   0  0  0  0  0  0  0  0  0  0  0  0
    6.0268    3.2445    0.0000 C   0  0  0  0  0  0  0  0  0  0  0  0
    6.9674    4.3135    0.0000 C   0  0  0  0  0  0  0  0  0  0  0  0
    7.6283    0.0451    0.0000 C   0  0  0  0  0  0  0  0  0  0  0  0
    8.5527    1.1283    0.0000 C   0  0  0  0  0  0  0  0  0  0  0  0
    6.6440    2.7014    0.0000 C   0  0  0  0  0  0  0  0  0  0  0  0
    7.5846    3.7705    0.0000 C   0  0  0  0  0  0  0  0  0  0  0  0
    8.4032    0.3198    0.0000 C   0  0  0  0  0  0  0  0  0  0  0  0
    9.3276    1.4030    0.0000 C   0  0  0  0  0  0  0  0  0  0  0  0
    7.4229    2.9644    0.0000 C   0  0  0  0  0  0  0  0  0  0  0  0
    8.3636    4.0335    0.0000 C   0  0  0  0  0  0  0  0  0  0  0  0
    9.0286   -0.2139    0.0000 C   0  0  0  0  0  0  0  0  0  0  0  0
    9.9530    0.8693    0.0000 C   0  0  0  0  0  0  0  0  0  0  0  0
    8.0402    2.4213    0.0000 C   0  0  0  0  0  0  0  0  0  0  0  0
    8.9808    3.4904    0.0000 C   0  0  0  0  0  0  0  0  0  0  0  0
    9.8034    0.0609    0.0000 C   0  0  0  0  0  0  0  0  0  0  0  0
    8.8191    2.6843    0.0000 C   0  0  0  0  0  0  0  0  0  0  0  0
   10.4288   -0.4729    0.0000 C   0  0  0  0  0  0  0  0  0  0  0  0
    9.4363    2.1412    0.0000 C   0  0  0  0  0  0  0  0  0  0  0  0
  1  2  1  0      
  2  3  1  0      
  3  4  1  0      
  4  5  2  0      
  5  1  1  0      
  4  6  1  0      
  6  7  2  0      
  7  8  1  0      
  8  9  2  0      
  9  5  1  0      
  9 10  1  0      
 10 11  2  0      
 11 12  1  0      
 12  1  2  0      
 12 13  1  0      
 13 14  2  0      
 14 15  1  0      
 15  2  2  0      
  3 16  2  0      
 16 17  1  0      
 17 18  2  0      
 18  6  1  0      
 15 19  1  0      
 16 20  1  0      
 19 20  2  0      
 17 21  1  0      
 18 22  1  0      
 22 23  2  0      
 21 24  2  0      
 23 24  1  0      
  7 25  1  0      
 25 26  2  0      
  8 27  1  0      
 27 28  2  0      
 28 26  1  0      
 10 29  1  0      
 11 30  1  0      
 30 31  2  0      
 29 32  2  0      
 32 31  1  0      
 13 33  1  0      
 33 34  2  0      
 14 35  1  0      
 35 36  2  0      
 34 36  1  0      
 19 37  1  0      
 20 38  1  0      
 37 39  2  0      
 38 40  2  0      
 39 40  1  0      
 33 30  1  0      
 29 27  1  0      
 25 22  1  0      
 38 21  1  0      
 35 37  1  0      
 39 41  1  0      
 40 42  1  0      
 41 43  1  0      
 43 42  1  0      
 24 44  1  0      
 23 45  1  0      
 44 46  1  0      
 45 46  1  0      
 26 47  1  0      
 28 48  1  0      
 48 49  1  0      
 49 47  1  0      
 32 50  1  0      
 31 51  1  0      
 51 52  1  0      
 52 50  1  0      
 34 53  1  0      
 36 54  1  0      
 53 55  1  0      
 55 54  1  0      
 54 41  2  0      
 42 44  2  0      
 47 45  2  0      
 50 48  2  0      
 51 53  2  0      
 43 56  2  0      
 46 57  2  0      
 49 58  1  0      
 52 59  2  0      
 55 60  2  0      
 60 56  1  0      
 56 57  1  0      
 57 58  1  0      
 58 59  1  0      
 59 60  1  0      
 63 67  2  0      
 67 69  1  0      
 69 71  2  0      
 71 68  1  0      
 68 66  2  0      
 66 63  1  0      
 69 72  1  0      
 68 70  1  0      
 72 74  1  0      
 70 73  1  0      
 73 75  1  0      
 75 78  1  0      
 75 77  1  0      
 78 82  1  0      
 82 86  1  0      
 86 90  1  0      
 90 94  1  0      
 94 98  1  0      
 98102  1  0      
102106  1  0      
106110  1  0      
110114  1  0      
 77 81  1  0      
 81 85  1  0      
 85 89  1  0      
 89 93  1  0      
 93 97  1  0      
 97101  1  0      
101105  1  0      
105109  1  0      
109113  1  0      
113117  1  0      
117119  1  0      
 74 76  1  0      
 76 80  1  0      
 76 79  1  0      
 79 83  1  0      
 83 87  1  0      
 87 91  1  0      
 91 95  1  0      
 95 99  1  0      
 99103  1  0      
103107  1  0      
107111  1  0      
111115  1  0      
115118  1  0      
118120  1  0      
 80 84  1  0      
 84 88  1  0      
 88 92  1  0      
 92 96  1  0      
 96100  1  0      
100104  1  0      
104108  1  0      
108112  1  0      
112116  1  0      
 64 62  1  0      
 61 62  1  0      
 62 65  1  0      
 63 61  1  0      
 58 61  1  0      
 49 64  1  0      
M  END
