# Supplementary material for: Directed assembly of optoelectronically active alkyl–π-conjugated molecules by adding n-alkanes or π-conjugated species
Source: Springer Nature journal article supplement (doi:10.1038/nchem.1977), 2014-06-20
Supplement: 41557_2014_BFnchem1977_MOESM3_ESM.mol [file 41557_2014_BFnchem1977_MOESM3_ESM.mol]

  ChemDraw06031408202D

108140  0  0  0  0  0  0  0  0999 V2000
   -3.7394   -1.7353    0.0000 C   0  0  0  0  0  0  0  0  0  0  0  0
   -3.7394   -2.5510    0.0000 C   0  0  0  0  0  0  0  0  0  0  0  0
   -2.9636   -2.8030    0.0000 C   0  0  0  0  0  0  0  0  0  0  0  0
   -2.4842   -2.1431    0.0000 C   0  0  0  0  0  0  0  0  0  0  0  0
   -2.9636   -1.4832    0.0000 C   0  0  0  0  0  0  0  0  0  0  0  0
   -1.6730   -2.0579    0.0000 C   0  0  0  0  0  0  0  0  0  0  0  0
   -1.3412   -1.3127    0.0000 C   0  0  0  0  0  0  0  0  0  0  0  0
   -1.8207   -0.6528    0.0000 C   0  0  0  0  0  0  0  0  0  0  0  0
   -2.6319   -0.7381    0.0000 C   0  0  0  0  0  0  0  0  0  0  0  0
   -3.4002   -0.1396    0.0000 C   0  0  0  0  0  0  0  0  0  0  0  0
   -4.1760   -0.3916    0.0000 C   0  0  0  0  0  0  0  0  0  0  0  0
   -4.3455   -1.1895    0.0000 C   0  0  0  0  0  0  0  0  0  0  0  0
   -5.1522   -1.7353    0.0000 C   0  0  0  0  0  0  0  0  0  0  0  0
   -5.1522   -2.5510    0.0000 C   0  0  0  0  0  0  0  0  0  0  0  0
   -4.4458   -2.9588    0.0000 C   0  0  0  0  0  0  0  0  0  0  0  0
   -2.6319   -3.5482    0.0000 C   0  0  0  0  0  0  0  0  0  0  0  0
   -1.8207   -3.6334    0.0000 C   0  0  0  0  0  0  0  0  0  0  0  0
   -1.3412   -2.9735    0.0000 C   0  0  0  0  0  0  0  0  0  0  0  0
   -4.3677   -3.7577    0.0000 C   0  0  0  0  0  0  0  0  0  0  0  0
   -3.3480   -4.0976    0.0000 C   0  0  0  0  0  0  0  0  0  0  0  0
   -1.8207   -4.4491    0.0000 C   0  0  0  0  0  0  0  0  0  0  0  0
   -0.5533   -2.7624    0.0000 C   0  0  0  0  0  0  0  0  0  0  0  0
   -0.5533   -3.5781    0.0000 C   0  0  0  0  0  0  0  0  0  0  0  0
   -1.0328   -4.2380    0.0000 C   0  0  0  0  0  0  0  0  0  0  0  0
   -0.5255   -1.3127    0.0000 C   0  0  0  0  0  0  0  0  0  0  0  0
   -0.5255   -0.4970    0.0000 C   0  0  0  0  0  0  0  0  0  0  0  0
   -1.8207    0.1629    0.0000 C   0  0  0  0  0  0  0  0  0  0  0  0
   -1.0328   -0.0483    0.0000 C   0  0  0  0  0  0  0  0  0  0  0  0
   -2.9924    0.5668    0.0000 C   0  0  0  0  0  0  0  0  0  0  0  0
   -4.9638   -0.1805    0.0000 C   0  0  0  0  0  0  0  0  0  0  0  0
   -4.5560    0.5259    0.0000 C   0  0  0  0  0  0  0  0  0  0  0  0
   -3.7802    0.7779    0.0000 C   0  0  0  0  0  0  0  0  0  0  0  0
   -5.5600   -1.0289    0.0000 C   0  0  0  0  0  0  0  0  0  0  0  0
   -6.1368   -1.6057    0.0000 C   0  0  0  0  0  0  0  0  0  0  0  0
   -5.5600   -3.2574    0.0000 C   0  0  0  0  0  0  0  0  0  0  0  0
   -6.1368   -2.6806    0.0000 C   0  0  0  0  0  0  0  0  0  0  0  0
   -5.0741   -4.1655    0.0000 C   0  0  0  0  0  0  0  0  0  0  0  0
   -2.9402   -4.8040    0.0000 C   0  0  0  0  0  0  0  0  0  0  0  0
   -4.6651   -4.7349    0.0000 C   0  0  0  0  0  0  0  0  0  0  0  0
   -3.8154   -5.0323    0.0000 C   0  0  0  0  0  0  0  0  0  0  0  0
   -5.3715   -5.1427    0.0000 C   0  0  0  0  0  0  0  0  0  0  0  0
   -3.6042   -5.8202    0.0000 C   0  0  0  0  0  0  0  0  0  0  0  0
   -4.5376   -5.7971    0.0000 C   0  0  0  0  0  0  0  0  0  0  0  0
   -1.0328   -5.0537    0.0000 C   0  0  0  0  0  0  0  0  0  0  0  0
    0.2345   -3.3670    0.0000 C   0  0  0  0  0  0  0  0  0  0  0  0
   -0.0764   -4.4800    0.0000 C   0  0  0  0  0  0  0  0  0  0  0  0
    0.2901   -0.4970    0.0000 C   0  0  0  0  0  0  0  0  0  0  0  0
   -0.8217    0.7396    0.0000 C   0  0  0  0  0  0  0  0  0  0  0  0
    0.1360    0.3636    0.0000 C   0  0  0  0  0  0  0  0  0  0  0  0
   -3.5691    1.5658    0.0000 C   0  0  0  0  0  0  0  0  0  0  0  0
   -5.2624    0.9337    0.0000 C   0  0  0  0  0  0  0  0  0  0  0  0
   -4.6856    1.5105    0.0000 C   0  0  0  0  0  0  0  0  0  0  0  0
   -6.8432   -1.1978    0.0000 C   0  0  0  0  0  0  0  0  0  0  0  0
   -6.7135   -3.2574    0.0000 C   0  0  0  0  0  0  0  0  0  0  0  0
   -7.2144   -2.2706    0.0000 C   0  0  0  0  0  0  0  0  0  0  0  0
   -4.8126   -6.5621    0.0000 C   0  0  0  0  0  0  0  0  0  0  0  0
    0.5700   -4.9729    0.0000 C   0  0  0  0  0  0  0  0  0  0  0  0
    0.7645    0.8792    0.0000 C   0  0  0  0  0  0  0  0  0  0  0  0
   -5.0152    2.2536    0.0000 C   0  0  0  0  0  0  0  0  0  0  0  0
   -8.0254   -2.3260    0.0000 C   0  0  0  0  0  0  0  0  0  0  0  0
    1.0140    1.8012    0.0000 C   0  0  0  0  0  0  0  0  0  0  0  0
   -0.3224    1.7718    0.0000 C   0  0  0  0  0  0  0  0  0  0  0  0
    1.7953    1.9369    0.0000 C   0  0  0  0  0  0  0  0  0  0  0  0
    0.3351    2.2873    0.0000 N   0  0  0  0  0  0  0  0  0  0  0  0
    2.2374    1.2193    0.0000 C   0  0  0  0  0  0  0  0  0  0  0  0
    2.1742    2.6923    0.0000 C   0  0  0  0  0  0  0  0  0  0  0  0
    0.3316    3.1503    0.0000 C   0  0  0  0  0  0  0  0  0  0  0  0
    3.0583    1.2571    0.0000 C   0  0  0  0  0  0  0  0  0  0  0  0
    2.9951    2.7301    0.0000 C   0  0  0  0  0  0  0  0  0  0  0  0
    3.4989    0.5420    0.0000 O   0  0  0  0  0  0  0  0  0  0  0  0
    3.4372    2.0125    0.0000 C   0  0  0  0  0  0  0  0  0  0  0  0
    3.3727    3.4829    0.0000 O   0  0  0  0  0  0  0  0  0  0  0  0
    4.3581    0.9649    0.0000 C   0  0  0  0  0  0  0  0  0  0  0  0
    4.1200    3.1361    0.0000 C   0  0  0  0  0  0  0  0  0  0  0  0
    5.0437    0.5061    0.0000 C   0  0  0  0  0  0  0  0  0  0  0  0
    4.7950    3.6105    0.0000 C   0  0  0  0  0  0  0  0  0  0  0  0
    4.9891   -0.3171    0.0000 C   0  0  0  0  0  0  0  0  0  0  0  0
    5.7839    0.8704    0.0000 C   0  0  0  0  0  0  0  0  0  0  0  0
    5.5433    3.2633    0.0000 C   0  0  0  0  0  0  0  0  0  0  0  0
    4.7215    4.4323    0.0000 C   0  0  0  0  0  0  0  0  0  0  0  0
    5.6748   -0.7760    0.0000 C   0  0  0  0  0  0  0  0  0  0  0  0
    5.8385    1.6936    0.0000 C   0  0  0  0  0  0  0  0  0  0  0  0
    6.4695    0.4116    0.0000 C   0  0  0  0  0  0  0  0  0  0  0  0
    6.2182    3.7378    0.0000 C   0  0  0  0  0  0  0  0  0  0  0  0
    5.6168    2.4416    0.0000 C   0  0  0  0  0  0  0  0  0  0  0  0
    5.3964    4.9067    0.0000 C   0  0  0  0  0  0  0  0  0  0  0  0
    5.6202   -1.5992    0.0000 C   0  0  0  0  0  0  0  0  0  0  0  0
    7.2097    0.7759    0.0000 C   0  0  0  0  0  0  0  0  0  0  0  0
    6.9666    3.3905    0.0000 C   0  0  0  0  0  0  0  0  0  0  0  0
    5.3230    5.7285    0.0000 C   0  0  0  0  0  0  0  0  0  0  0  0
    6.3058   -2.0580    0.0000 C   0  0  0  0  0  0  0  0  0  0  0  0
    4.8800   -1.9635    0.0000 C   0  0  0  0  0  0  0  0  0  0  0  0
    7.2643    1.5991    0.0000 C   0  0  0  0  0  0  0  0  0  0  0  0
    8.0254    0.7759    0.0000 C   0  0  0  0  0  0  0  0  0  0  0  0
    7.6176    0.0695    0.0000 C   0  0  0  0  0  0  0  0  0  0  0  0
    7.7823    3.3905    0.0000 C   0  0  0  0  0  0  0  0  0  0  0  0
    7.3744    4.0969    0.0000 C   0  0  0  0  0  0  0  0  0  0  0  0
    7.0401    2.5688    0.0000 C   0  0  0  0  0  0  0  0  0  0  0  0
    5.9979    6.2029    0.0000 C   0  0  0  0  0  0  0  0  0  0  0  0
    4.5746    6.0757    0.0000 C   0  0  0  0  0  0  0  0  0  0  0  0
    7.0460   -1.6937    0.0000 C   0  0  0  0  0  0  0  0  0  0  0  0
    6.7463    5.8557    0.0000 C   0  0  0  0  0  0  0  0  0  0  0  0
    7.4538   -2.4001    0.0000 C   0  0  0  0  0  0  0  0  0  0  0  0
    7.8617   -1.6937    0.0000 C   0  0  0  0  0  0  0  0  0  0  0  0
    7.1006   -0.8705    0.0000 C   0  0  0  0  0  0  0  0  0  0  0  0
    6.8197    5.0340    0.0000 C   0  0  0  0  0  0  0  0  0  0  0  0
    7.1541    6.5621    0.0000 C   0  0  0  0  0  0  0  0  0  0  0  0
    7.5619    5.8557    0.0000 C   0  0  0  0  0  0  0  0  0  0  0  0
  1  2  1  0      
  2  3  1  0      
  3  4  1  0      
  4  5  2  0      
  5  1  1  0      
  4  6  1  0      
  6  7  2  0      
  7  8  1  0      
  8  9  2  0      
  9  5  1  0      
  9 10  1  0      
 10 11  2  0      
 11 12  1  0      
 12  1  2  0      
 12 13  1  0      
 13 14  2  0      
 14 15  1  0      
 15  2  2  0      
  3 16  2  0      
 16 17  1  0      
 17 18  2  0      
 18  6  1  0      
 15 19  1  0      
 16 20  1  0      
 19 20  2  0      
 17 21  1  0      
 18 22  1  0      
 22 23  2  0      
 21 24  2  0      
 23 24  1  0      
  7 25  1  0      
 25 26  2  0      
  8 27  1  0      
 27 28  2  0      
 28 26  1  0      
 10 29  1  0      
 11 30  1  0      
 30 31  2  0      
 29 32  2  0      
 32 31  1  0      
 13 33  1  0      
 33 34  2  0      
 14 35  1  0      
 35 36  2  0      
 34 36  1  0      
 19 37  1  0      
 20 38  1  0      
 37 39  2  0      
 38 40  2  0      
 39 40  1  0      
 33 30  1  0      
 29 27  1  0      
 25 22  1  0      
 38 21  1  0      
 35 37  1  0      
 39 41  1  0      
 40 42  1  0      
 41 43  1  0      
 43 42  1  0      
 24 44  1  0      
 23 45  1  0      
 44 46  1  0      
 45 46  1  0      
 26 47  1  0      
 28 48  1  0      
 48 49  1  0      
 49 47  1  0      
 32 50  1  0      
 31 51  1  0      
 51 52  1  0      
 52 50  1  0      
 34 53  1  0      
 36 54  1  0      
 53 55  1  0      
 55 54  1  0      
 54 41  2  0      
 42 44  2  0      
 47 45  2  0      
 50 48  2  0      
 51 53  2  0      
 43 56  2  0      
 46 57  2  0      
 49 58  1  0      
 52 59  2  0      
 55 60  2  0      
 60 56  1  0      
 56 57  1  0      
 57 58  1  0      
 58 59  1  0      
 59 60  1  0      
 62 64  1  0      
 61 64  1  0      
 64 67  1  0      
 63 66  2  0      
 66 69  1  0      
 69 71  2  0      
 71 68  1  0      
 68 65  2  0      
 65 63  1  0      
 69 72  1  0      
 68 70  1  0      
 72 74  1  0      
 70 73  1  0      
 73 75  1  0      
 75 78  1  0      
 75 77  1  0      
 77 81  1  0      
 63 61  1  0      
 74 76  1  0      
 76 79  1  0      
 76 80  1  0      
 80 86  1  0      
 86 90  1  0      
 90 99  1  0      
 99102  1  0      
102107  1  0      
102106  1  0      
102108  1  0      
 79 84  1  0      
 90100  1  0      
 84 89  1  0      
 89 96  1  0      
 89 98  1  0      
 89 97  1  0      
 79 85  1  0      
 78 82  1  0      
 78 83  1  0      
 83 88  1  0      
 88 95  1  0      
 88 93  1  0      
 88 94  1  0      
 81 87  1  0      
 87 91  1  0      
 87 92  1  0      
 91101  1  0      
101104  1  0      
101105  1  0      
101103  1  0      
 49 62  1  0      
 58 61  1  0      
M  END
